# Supplementary material
Source: PubMed Central journal article supplement (PMC8959472)

# THE LANCET

## Child & Adolescent Health

### Supplementary appendix

This appendix formed part of the original submission and has been peer reviewed. We post it as supplied by the authors.

Supplement to: Mensah AA, Campbell H, Stowe J, et al. Risk of SARS-CoV-2 reinfections in children: a prospective national surveillance study between January, 2020, and July, 2021, in England. *Lancet Child Adolesc Health* 2022; published online March 28. [https://doi.org/10.1016/S2352-4642\(22\)00059-1](https://doi.org/10.1016/S2352-4642(22)00059-1).

**Supplemental figure 1:** Cumulative weekly COVID-19 vaccination uptake in by age group and over time, England. Children were not eligible for COVID-19 vaccination during the surveillance period.

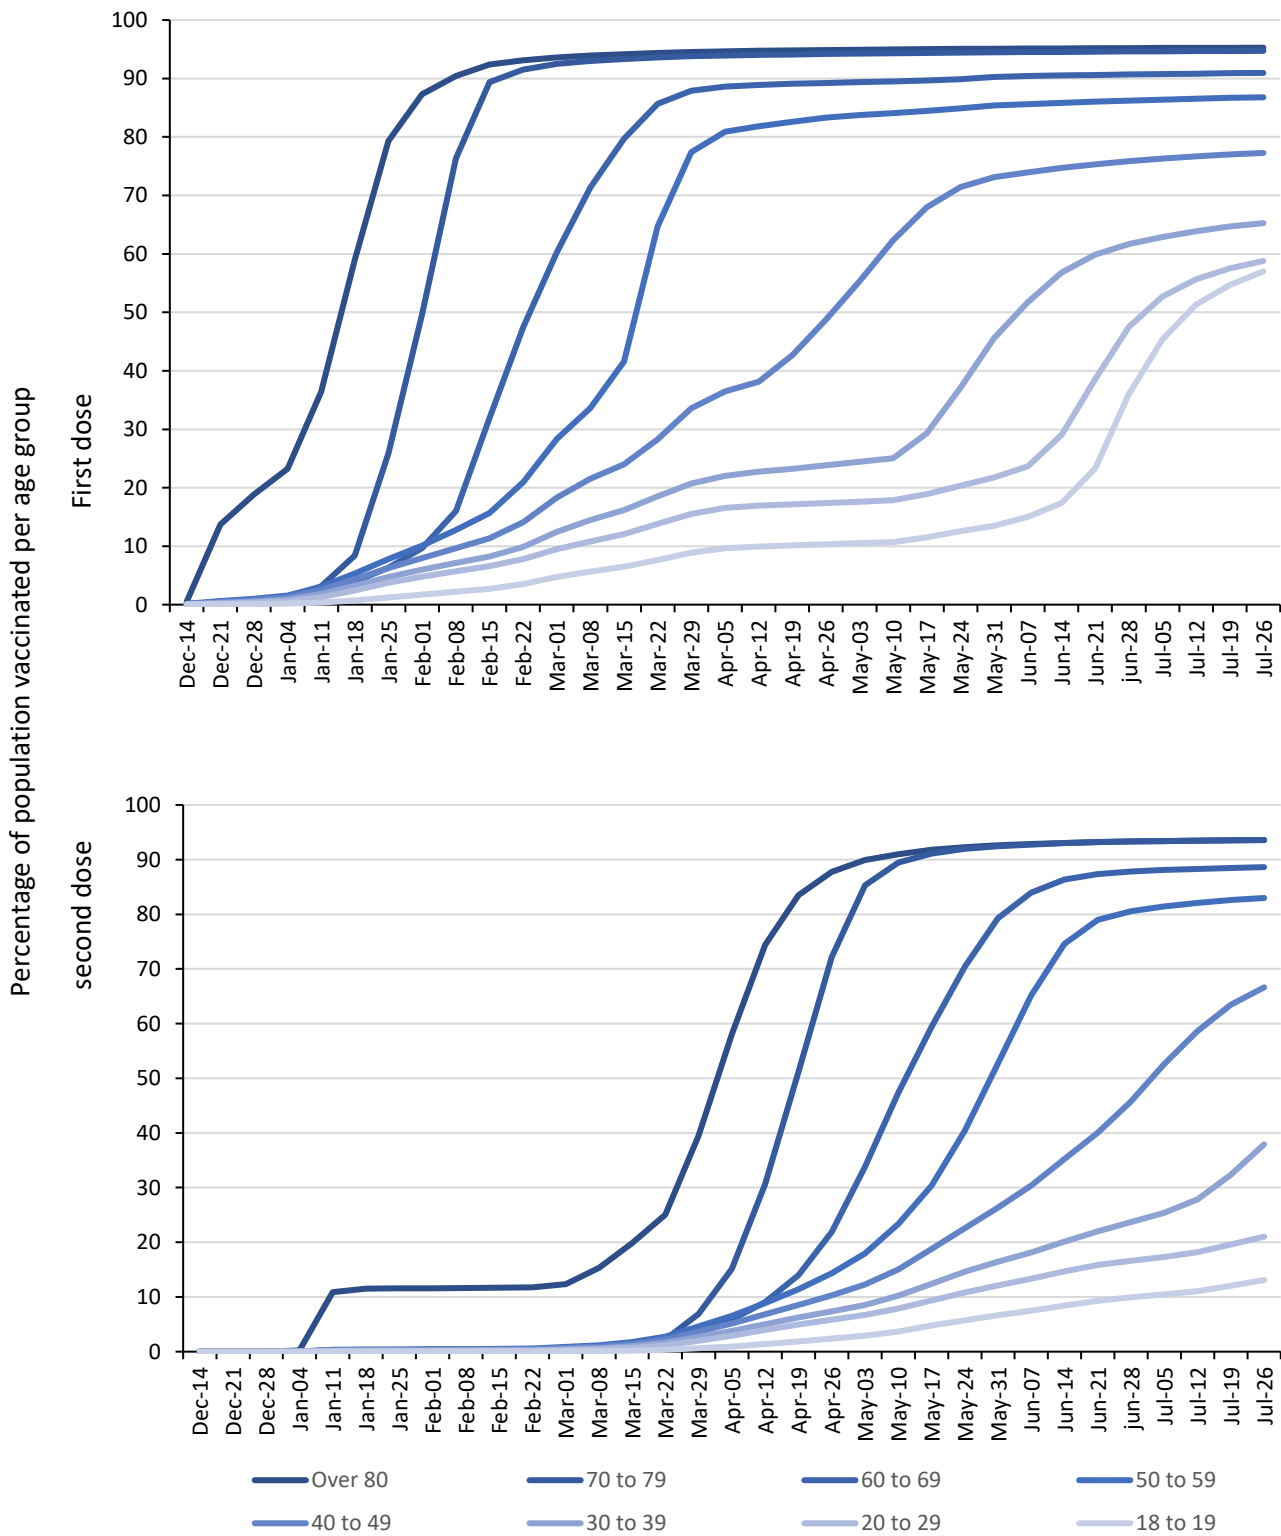

Supplementary Figure 2: Laboratory-confirmed reinfection rates with 95% confidence interval by age-group, including adult population for the period January 2020 to 31 July 2021, England

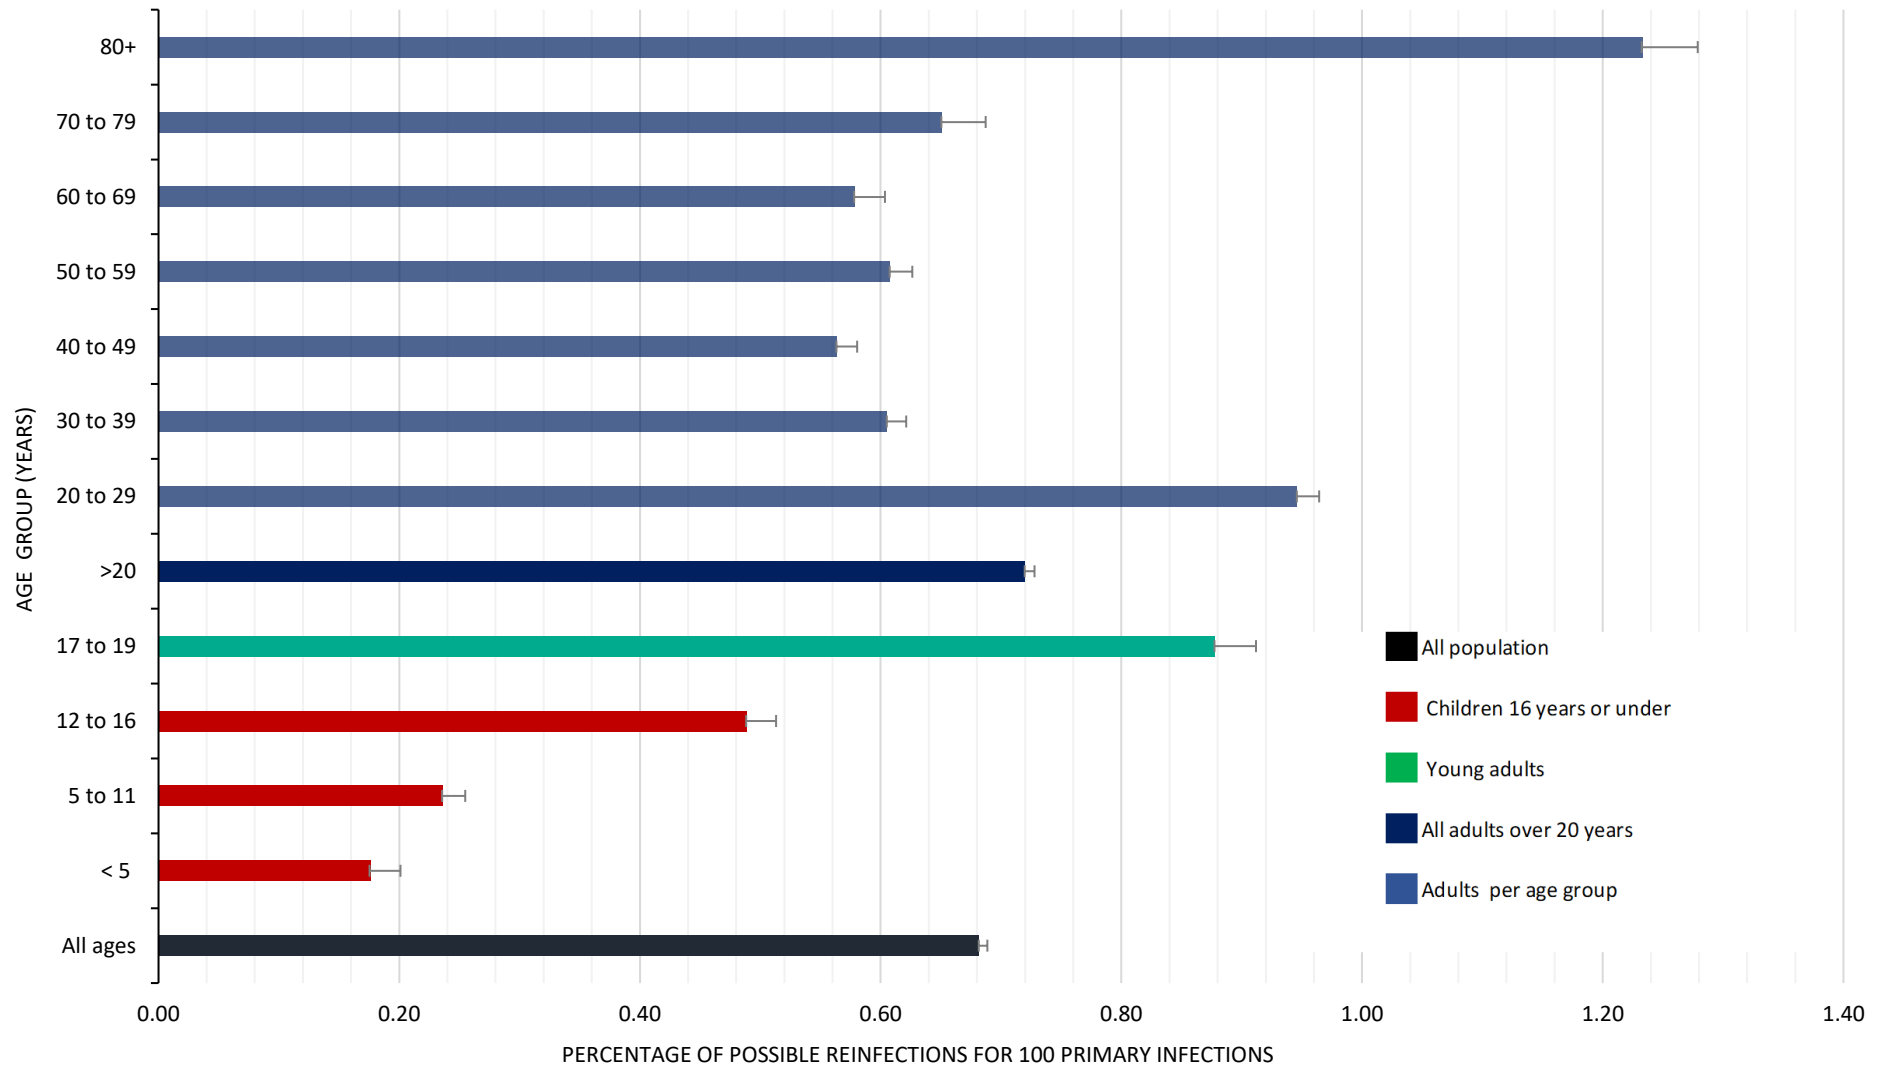

Supplementary Figure 3: Weekly rates of SARS-CoV-2 possible reinfection cases per 100,000 population in different age groups including adults, England

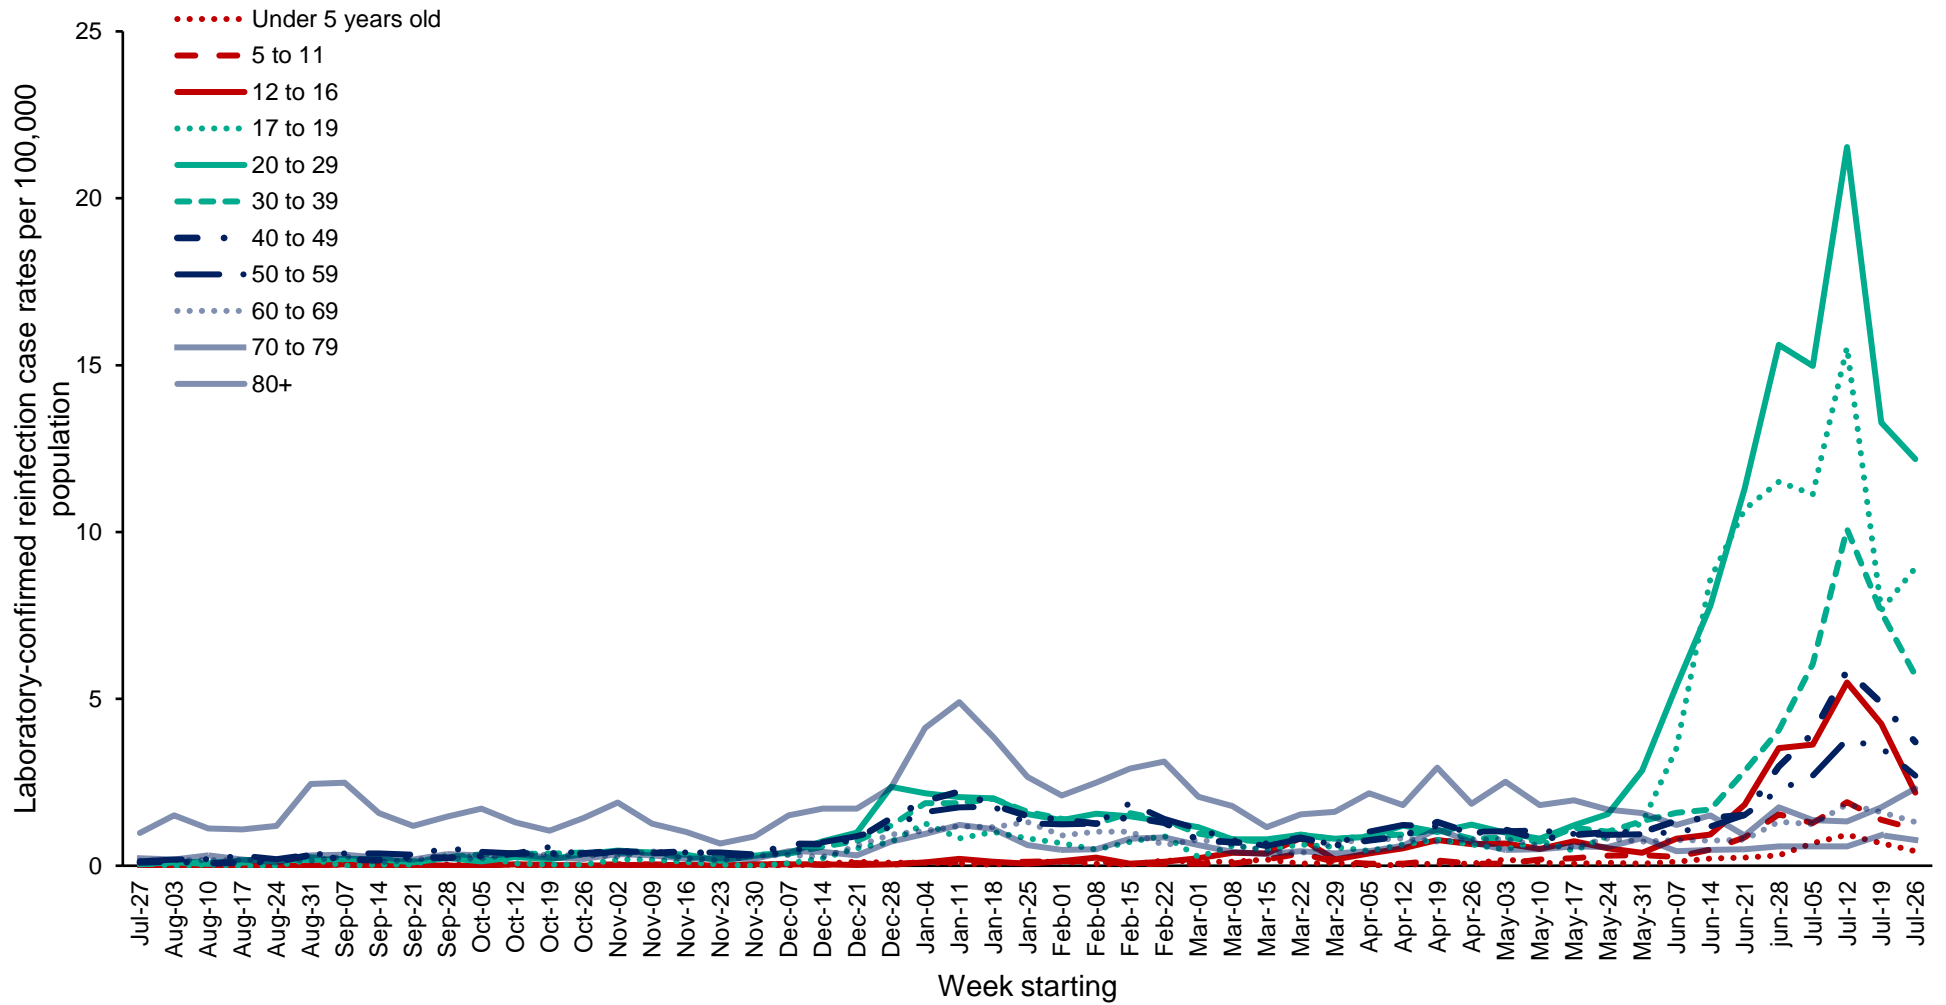

Supplement: mmc1.pdf [file mmc1.pdf]
